# Supplementary material
Source: PubMed Central journal article supplement (PMC1739615)

IMAGE PRE-PROCESSING

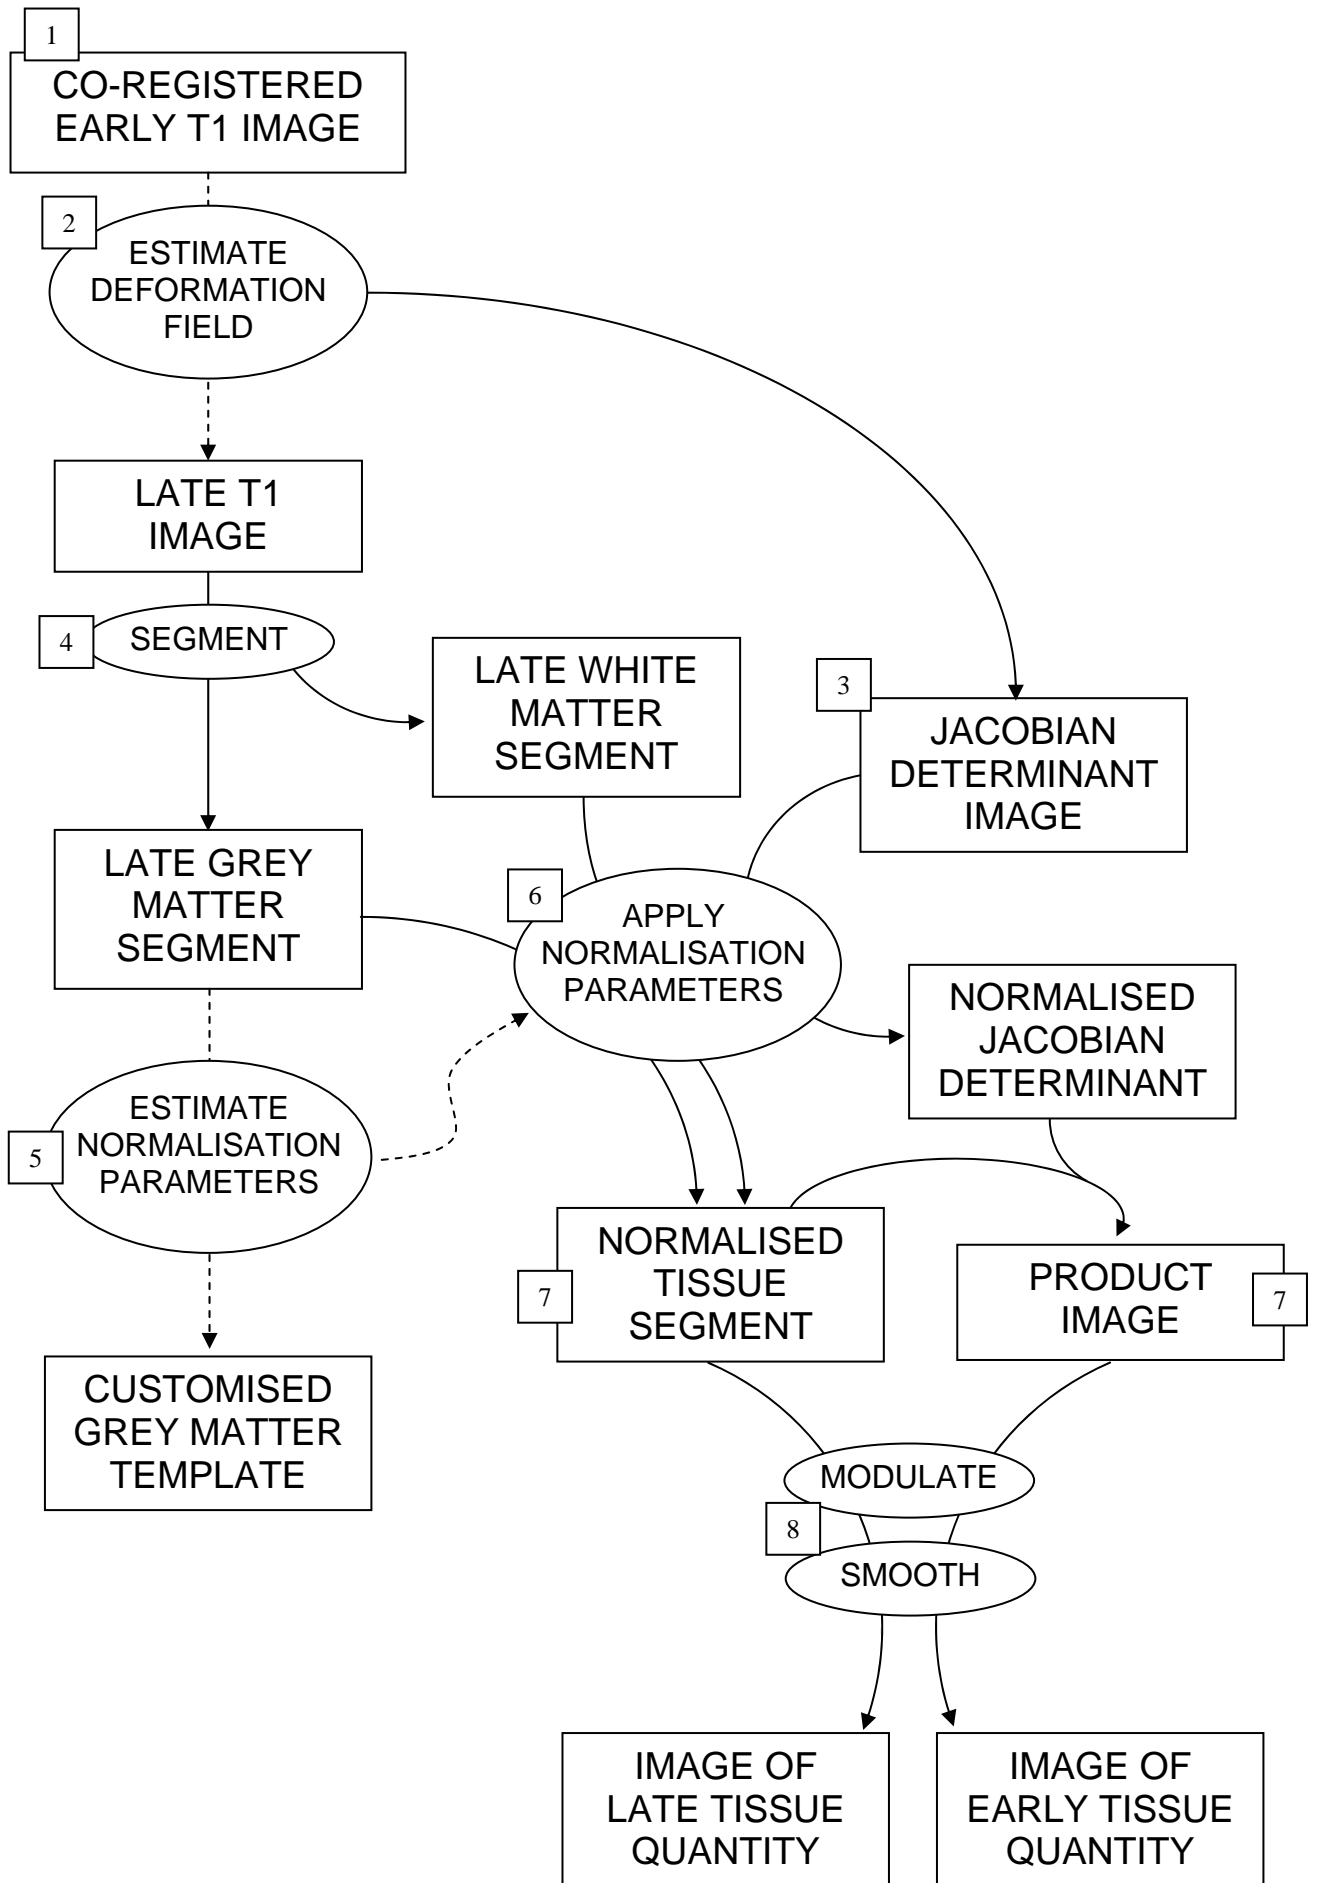

Supplement: jnnpsyc_76_5_650__1.pdf [file jnnpsyc_76_5_650__1.pdf]
